# Supplementary material for: Transcriptome Analysis of Duck and Chicken Brains Infected with Aquatic Bird Bornavirus-1 (ABBV-1)
Source: MDPI journal article supplement (doi:10.3390/v14102211), 2022-10-08
Supplement: s1 [file s1]

## Supplementary Materials

**Table S1.** Summary of individual bird ABBV-1 RNA copy number and histology score data in brains of ducks and chickens.

| Bird Identifier <sup>1</sup> | Weeks Post-infection | ABBV-1 RNA Copy Number <sup>2</sup> | Histology Score <sup>3</sup> |
|------------------------------|----------------------|-------------------------------------|------------------------------|
| D501                         | 4                    | 7.09                                | 2.0                          |
| D508                         | 4                    | 7.21                                | 3.0                          |
| D509                         | 4                    | 5.98                                | 4.0                          |
| D513                         | 4                    | 7.18                                | 3.0                          |
| D522                         | 4                    | 7.06                                | 3.0                          |
| D524                         | 4                    | 6.57                                | 3.0                          |
| D544                         | 4                    | 7.01                                | 3.5                          |
| D503                         | 12                   | 7.14                                | 2.0                          |
| D504                         | 12                   | 7.33                                | 1.0                          |
| D526                         | 12                   | 7.09                                | 3.0                          |
| D506                         | 12                   | 7.12                                | 2.0                          |
| D507                         | 12                   | 7.14                                | 2.0                          |
| D521                         | 12                   | 7.13                                | 2.0                          |
| D525                         | 12                   | 7.10                                | 1.5                          |
| C114                         | 4                    | 3.51                                | 0                            |
| C117                         | 4                    | 6.32                                | 0                            |
| C125                         | 4                    | 3.72                                | 0                            |
| C131                         | 4                    | 5.62                                | 0                            |
| C133                         | 4                    | 3.69                                | 0                            |
| C134                         | 4                    | 5.51                                | 0                            |
| C139                         | 4                    | 6.40                                | 0                            |
| C104                         | 12                   | 7.18                                | 3.5                          |
| C105                         | 12                   | 5.83                                | 2.0                          |
| C106                         | 12                   | 6.05                                | 5.5                          |
| C111                         | 12                   | 7.03                                | 4.5                          |
| C124                         | 12                   | 6.22                                | 4.3                          |
| C127                         | 12                   | 7.08                                | 3.7                          |
| C140                         | 12                   | 6.52                                | 3.8                          |

<sup>1</sup> Each bird was identified separately using a code. For ducks, the identifier began with “D” followed by a number in the 500 range for infected birds and in the 800 range for control birds. For chickens, the identifier began with “C” followed by a number in the 100 range for infected birds and in the 400 range for control birds. Only birds exposed to ABBV-1 are shown since control birds tested negative for ABBV-1 by RT-qPCR and showed no inflammation.

<sup>2</sup> Log10 virus RNA copies / 150 ng of tissue RNA.

<sup>3</sup> Semi-quantitative severity of microscopic inflammation (0-6).

Data adapted from Iverson et al. [15] and Iverson et al. [16].

**Table S2.** Summary of sequencing analysis in infected and control ducks

| <b>Sample<sup>1</sup></b> | <b>Raw Reads</b> | <b>Surviving Reads</b> | <b>Surviving Reads (%)</b> | <b>Aligned Reads</b> | <b>Reads Aligned (%)</b> | <b>Mean Coverage Per Base</b> | <b>Genes</b> |
|---------------------------|------------------|------------------------|----------------------------|----------------------|--------------------------|-------------------------------|--------------|
| D501                      | 92,052,122       | 92,022,688             | 99.97                      | 67,491,420           | 73.34                    | 47.41                         | 9942         |
| D503                      | 105,799,486      | 105,775,660            | 99.98                      | 80,185,031           | 75.81                    | 54.63                         | 9871         |
| D504                      | 128,130,980      | 128,089,986            | 99.97                      | 93,038,833           | 72.64                    | 59.32                         | 10080        |
| D506                      | 105,351,130      | 105,322,586            | 99.97                      | 78,703,384           | 74.73                    | 53.31                         | 9883         |
| D507                      | 110,641,640      | 110,612,624            | 99.97                      | 84,187,758           | 76.11                    | 55.99                         | 9912         |
| D508                      | 98,497,204       | 98,477,728             | 99.98                      | 77,071,051           | 78.26                    | 53.91                         | 10004        |
| D509                      | 91,840,532       | 91,824,644             | 99.98                      | 71,471,183           | 77.83                    | 50.21                         | 10006        |
| D513                      | 94,933,588       | 94,907,252             | 99.97                      | 70,157,457           | 73.92                    | 48.39                         | 9949         |
| D521                      | 96,605,420       | 96,575,988             | 99.97                      | 72,360,454           | 74.93                    | 49.80                         | 9833         |
| D522                      | 122,038,990      | 122,011,076            | 99.98                      | 93,175,575           | 76.37                    | 64.47                         | 9912         |
| D524                      | 112,061,552      | 111,999,544            | 99.94                      | 86,010,505           | 76.80                    | 58.20                         | 9934         |
| D525                      | 98,021,016       | 97,991,816             | 99.97                      | 73,774,097           | 75.29                    | 51.47                         | 9779         |
| D526                      | 95,660,234       | 95,629,156             | 99.97                      | 72,356,902           | 75.66                    | 47.67                         | 9792         |
| D544                      | 100,006,296      | 99,978,392             | 99.97                      | 76,319,266           | 76.34                    | 52.97                         | 9912         |
| D801                      | 99,744,778       | 99,722,322             | 99.98                      | 77,151,071           | 77.37                    | 56.43                         | 9821         |
| D804                      | 136,268,072      | 136,235,632            | 99.98                      | 109,746,995          | 80.56                    | 80.03                         | 9896         |
| D809                      | 86,649,730       | 86,629,104             | 99.98                      | 68,217,240           | 78.75                    | 49.49                         | 9787         |
| D810                      | 94,610,958       | 94,592,716             | 99.98                      | 72,749,313           | 76.91                    | 51.79                         | 9758         |
| D811                      | 89,476,392       | 89,453,330             | 99.97                      | 69,747,689           | 77.97                    | 49.27                         | 9810         |
| D814                      | 66,851,188       | 66,834,424             | 99.97                      | 53,167,653           | 79.55                    | 38.44                         | 9703         |
| D816                      | 114,876,394      | 114,848,348            | 99.98                      | 87,343,231           | 76.05                    | 57.38                         | 10017        |
| D819                      | 90,986,520       | 90,962,266             | 99.97                      | 69,149,176           | 76.02                    | 50.73                         | 9758         |
| D820                      | 111,699,116      | 111,670,330            | 99.97                      | 85,686,583           | 76.73                    | 59.87                         | 9894         |
| D821                      | 88,513,744       | 88,494,472             | 99.98                      | 69,892,846           | 78.98                    | 48.31                         | 9915         |
| D822                      | 108,677,928      | 108,652,292            | 99.98                      | 86,389,094           | 79.51                    | 60.23                         | 9828         |
| D824                      | 98,564,074       | 98,540,136             | 99.98                      | 76,167,795           | 77.30                    | 54.20                         | 9802         |
| D829                      | 92,476,548       | 92,453,962             | 99.98                      | 72,058,800           | 77.94                    | 54.28                         | 9768         |
| D836                      | 96,384,640       | 96,360,398             | 99.97                      | 75,423,029           | 78.27                    | 54.22                         | 9857         |

<sup>1</sup> Each bird was identified separately using a code. For ducks, the identifier began with “D” followed by a number in the 500 range for infected birds and in the 800 range for control birds.

**Table S3.** Summary of sequencing analysis in infected and control chickens

| <b>Sample<sup>1</sup></b> | <b>Raw Reads</b> | <b>Surviving Reads</b> | <b>Surviving Reads (%)</b> | <b>Aligned Reads</b> | <b>Reads Aligned (%)</b> | <b>Mean Coverage Per Base</b> | <b>Genes</b> |
|---------------------------|------------------|------------------------|----------------------------|----------------------|--------------------------|-------------------------------|--------------|
| C104                      | 170,553,534      | 170,491,518            | 99.96                      | 157,453,838          | 92.32                    | 98.56                         | 11,961       |
| C105                      | 82,253,152       | 82,224,678             | 99.97                      | 76,614,839           | 93.15                    | 54.89                         | 11,830       |
| C106                      | 85,697,124       | 85,663,430             | 99.96                      | 79,944,905           | 93.29                    | 49.75                         | 11,793       |
| C111                      | 91,366,276       | 91,339,968             | 99.97                      | 85,329,583           | 93.39                    | 55.86                         | 11,793       |
| C114                      | 109,319,382      | 109,301,638            | 99.98                      | 105,541,702          | 96.54                    | 72.98                         | 11,724       |
| C117                      | 108,024,342      | 107,992,970            | 99.97                      | 103,849,133          | 96.13                    | 74.22                         | 11,743       |
| C124                      | 101,526,562      | 101,485,028            | 99.96                      | 93,362,631           | 91.96                    | 58.00                         | 11,836       |
| C125                      | 109,485,062      | 109,447,364            | 99.97                      | 105,056,575          | 95.96                    | 73.24                         | 11,854       |
| C127                      | 119,335,264      | 119,287,442            | 99.96                      | 109,820,103          | 92.03                    | 68.26                         | 11,964       |
| C131                      | 110,499,004      | 110,467,034            | 99.97                      | 106,071,134          | 95.99                    | 73.34                         | 11,807       |
| C133                      | 95,493,706       | 95,472,606             | 99.98                      | 92,251,102           | 96.60                    | 65.39                         | 11,886       |
| C134                      | 136,947,300      | 136,917,580            | 99.98                      | 131,480,101          | 96.01                    | 93.57                         | 11,856       |
| C139                      | 83,791,650       | 83,767,934             | 99.97                      | 80,304,791           | 95.84                    | 57.70                         | 11,818       |
| C140                      | 96,985,440       | 96,935,976             | 99.95                      | 88,501,009           | 91.25                    | 53.80                         | 11,836       |
| C403                      | 83,833,816       | 83,813,664             | 99.98                      | 79,375,323           | 94.68                    | 58.74                         | 11,851       |
| C404                      | 102,120,914      | 102,088,234            | 99.97                      | 96,229,198           | 94.23                    | 67.45                         | 11,901       |
| C407                      | 85,518,226       | 85,490,602             | 99.97                      | 80,666,304           | 94.33                    | 59.62                         | 11,802       |
| C409                      | 143,772,338      | 143,735,444            | 99.97                      | 137,577,953          | 95.69                    | 101.57                        | 11,990       |
| C417                      | 97,030,904       | 97,006,860             | 99.98                      | 91,438,115           | 94.24                    | 67.64                         | 11,837       |
| C419                      | 104,177,232      | 104,147,948            | 99.97                      | 98,349,251           | 94.41                    | 66.87                         | 11,697       |
| C425                      | 99,279,684       | 99,253,868             | 99.97                      | 94,520,756           | 95.21                    | 65.91                         | 11,814       |
| C427                      | 95,074,400       | 95,046,088             | 99.97                      | 89,810,802           | 94.46                    | 63.48                         | 11,823       |
| C428                      | 100,897,280      | 100,868,378            | 99.97                      | 95,772,064           | 94.92                    | 67.25                         | 11,818       |
| C429                      | 82,578,244       | 82,556,586             | 99.97                      | 78,491,869           | 95.05                    | 56.14                         | 11,735       |
| C432                      | 102,381,214      | 102,352,790            | 99.97                      | 97,425,566           | 95.16                    | 69.48                         | 11,771       |
| C436                      | 112,510,720      | 112,488,264            | 99.98                      | 107,953,957          | 95.95                    | 75.70                         | 11,790       |
| C439                      | 84,298,534       | 84,266,556             | 99.96                      | 79,042,602           | 93.77                    | 54.61                         | 11,712       |
| C442                      | 104,205,752      | 104,169,724            | 99.97                      | 97,950,061           | 94.00                    | 74.52                         | 11,832       |

<sup>1</sup> Each bird was identified separately using a code. For chickens, the identifier began with “C” followed by a number in the 100 range for infected birds and in the 400 range for control birds.

**Table S4.** Top 20 highly up- and downregulated novel differentially expressed genes (DEG) in ducks

| Duck 4 wpi highly upregulated DEG   |                                  |                                                    |
|-------------------------------------|----------------------------------|----------------------------------------------------|
| Gene                                | Log <sub>2</sub> FC <sup>1</sup> | Protein Name (as provided in UniProt)              |
| ENSAPLG00000026791                  | 12.48                            | Ig-like domain-containing protein                  |
| ENSAPLG00000016552                  | 11.84                            | Ig-like domain-containing protein                  |
| ENSAPLG00000028125                  | 11.71                            | Ig-like domain-containing protein                  |
| ENSAPLG00000024383                  | 11.64                            | Uncharacterized protein                            |
| ENSAPLG00000021063                  | 11.56                            | Ig-like domain-containing protein                  |
| ENSAPLG00000019893                  | 11.38                            | Ig-like domain-containing protein                  |
| ENSAPLG00000031161                  | 11.36                            | Ig-like domain-containing protein                  |
| ENSAPLG00000016821                  | 11.16                            | Ig-like domain-containing protein                  |
| ENSAPLG00000018830                  | 11.15                            | Ig-like domain-containing protein                  |
| ENSAPLG00000024467                  | 10.86                            | Ig-like domain-containing protein                  |
| ENSAPLG00000021993                  | 10.72                            | Ig-like domain-containing protein                  |
| ENSAPLG00000016883                  | 10.64                            | Uncharacterized protein                            |
| ENSAPLG00000021802                  | 10.58                            | Uncharacterized protein                            |
| ENSAPLG00000025736                  | 10.50                            | Ig-like domain-containing protein                  |
| ENSAPLG00000030169                  | 10.43                            | Ig-like domain-containing protein                  |
| ENSAPLG00000024563                  | 10.37                            | Ig-like domain-containing protein                  |
| ENSAPLG00000029471                  | 10.25                            | Ig-like domain-containing protein                  |
| ENSAPLG00000027840                  | 10.22                            | Ig-like domain-containing protein                  |
| ENSAPLG00000025655                  | 10.13                            | SCY domain-containing protein                      |
| ENSAPLG00000025965                  | 9.94                             | Uncharacterized protein                            |
| Duck 4 wpi highly downregulated DEG |                                  |                                                    |
| Gene                                | Log <sub>2</sub> FC              | Description (as provided in Ensembl <sup>2</sup> ) |
| ENSAPLG00000019061                  | -4.56                            | Long non-coding RNA                                |
| ENSAPLG00000029485                  | -3.89                            | Long non-coding RNA                                |
| ENSAPLG00000028039                  | -2.79                            | Long non-coding RNA                                |
| ENSAPLG00000018213                  | -2.39                            | Long non-coding RNA                                |
| ENSAPLG00000021011                  | -2.26                            | Long non-coding RNA                                |
| ENSAPLG00000020436                  | -2.18                            | Long non-coding RNA                                |
| ENSAPLG00000022296                  | -2.15                            | Long non-coding RNA                                |
| ENSAPLG00000028968                  | -2.13                            | Long non-coding RNA                                |
| Duck 12 wpi highly upregulated DEG  |                                  |                                                    |
| Gene                                | Log <sub>2</sub> FC              | Protein Name (as provided in UniProt)              |
| ENSAPLG00000031161                  | 10.67                            | Ig-like domain-containing protein                  |
| ENSAPLG00000019893                  | 9.82                             | Ig-like domain-containing protein                  |
| ENSAPLG00000026791                  | 9.56                             | Ig-like domain-containing protein                  |
| ENSAPLG00000011142                  | 9.26                             | Uncharacterized protein                            |
| ENSAPLG00000028125                  | 8.83                             | Ig-like domain-containing protein                  |
| ENSAPLG00000016552                  | 8.28                             | Ig-like domain-containing protein                  |
| ENSAPLG00000021802                  | 8.22                             | Uncharacterized protein                            |
| ENSAPLG00000023118                  | 8.14                             | Ig-like domain-containing protein                  |
| ENSAPLG00000025965                  | 8.11                             | Uncharacterized protein                            |
| ENSAPLG00000002226                  | 8.07                             | Ig-like domain-containing protein                  |
| ENSAPLG00000024467                  | 7.63                             | Ig-like domain-containing protein                  |
| ENSAPLG00000024383                  | 7.46                             | Uncharacterized protein                            |
| ENSAPLG00000028723                  | 7.34                             | Ig-like domain-containing protein                  |
| ENSAPLG00000020906                  | 7.21                             | Ig-like domain-containing protein                  |
| ENSAPLG00000031023                  | 7.10                             | SCY domain-containing protein                      |
| ENSAPLG00000021063                  | 7.08                             | Ig-like domain-containing protein                  |

|                    |      |                                   |
|--------------------|------|-----------------------------------|
| ENSAPLG00000001610 | 6.80 | Uncharacterized protein           |
| ENSAPLG00000016883 | 6.75 | Uncharacterized protein           |
| ENSAPLG00000027840 | 6.50 | Ig-like domain-containing protein |
| ENSAPLG00000020955 | 6.49 | Ig-like domain-containing protein |

<sup>1</sup> Log<sub>2</sub>FC = Log<sub>2</sub> Fold Change

<sup>2</sup> Ensembl release 106: Apr 2022

**Table S5.** Top 20 highly up- and downregulated novel differentially expressed genes (DEG) in chickens

| Chicken 4 wpi highly upregulated DEG   |                                  |                                                               |
|----------------------------------------|----------------------------------|---------------------------------------------------------------|
| Gene                                   | Log <sub>2</sub> FC <sup>1</sup> | Description (Ensembl <sup>2</sup> ) or Protein Name (UniProt) |
| ENSGALG00000052161                     | 2.64                             | Long non-coding RNA                                           |
| ENSGALG00000009479                     | 2.04                             | Uncharacterized protein                                       |
| ENSGALG00000052516                     | 2.02                             | Long non-coding RNA                                           |
| Chicken 4 wpi highly downregulated DEG |                                  |                                                               |
| Gene                                   | Log <sub>2</sub> FC              | Description (Ensembl) or Protein Name (UniProt)               |
| ENSGALG00000053701                     | -4.55                            | G PROTEIN RECEPTOR 3 domain-containing protein                |
| ENSGALG00000053055                     | -3.56                            | B30.2/SPRY domain-containing protein                          |
| ENSGALG00000048771                     | -3.52                            | Uncharacterized protein                                       |
| ENSGALG00000049586                     | -3.47                            | Long non-coding RNA                                           |
| ENSGALG00000029331                     | -3.39                            | Long non-coding RNA                                           |
| ENSGALG00000052021                     | -3.34                            | Long non-coding RNA                                           |
| ENSGALG00000032417                     | -3.26                            | DNA helicase                                                  |
| ENSGALG00000054795                     | -3.18                            | TED complement domain-containing protein                      |
| ENSGALG00000038532                     | -3.17                            | Uncharacterized protein                                       |
| ENSGALG00000048945                     | -3.13                            | Long non-coding RNA                                           |
| ENSGALG00000011813                     | -3.11                            | EGF-like domain-containing protein                            |
| ENSGALG00000051290                     | -3.06                            | Uncharacterized protein                                       |
| ENSGALG00000047027                     | -2.00                            | ABC1 domain-containing protein                                |
| ENSGALG00000053449                     | -2.91                            | Uncharacterized protein                                       |
| ENSGALG00000054594                     | -2.91                            | Long non-coding RNA                                           |
| ENSGALG00000007740                     | -2.82                            | Wiskott-Aldrich syndrome protein family member                |
| ENSGALG00000043906                     | -2.79                            | chicken D-serine dehydratase                                  |
| ENSGALG00000051469                     | -2.69                            | Uncharacterized protein                                       |
| ENSGALG00000045762                     | -2.68                            | Uncharacterized protein                                       |
| ENSGALG00000030587                     | -2.68                            | PH domain-containing protein                                  |
| Chicken 12 wpi highly upregulated DEG  |                                  |                                                               |
| Gene                                   | Log <sub>2</sub> FC              | Protein Name (as provided in UniProt)                         |
| ENSGALG00000050545                     | 14.34                            | Ig-like domain-containing protein                             |
| ENSGALG00000048383                     | 14.27                            | Ig-like domain-containing protein                             |
| ENSGALG00000046719                     | 13.23                            | Ig-like domain-containing protein                             |
| ENSGALG00000047440                     | 13.15                            | Ig-like domain-containing protein                             |
| ENSGALG00000047866                     | 12.87                            | Ig-like domain-containing protein                             |
| ENSGALG00000053057                     | 12.59                            | Ig-like domain-containing protein                             |
| ENSGALG00000050515                     | 12.47                            | Ig-like domain-containing protein                             |
| ENSGALG00000049267                     | 11.91                            | Ig-like domain-containing protein                             |
| ENSGALG00000052142                     | 11.85                            | Ig-like domain-containing protein                             |
| ENSGALG00000015662                     | 11.83                            | Lipase domain-containing protein                              |
| ENSGALG00000050477                     | 11.51                            | Ig-like domain-containing protein                             |
| ENSGALG00000051617                     | 11.38                            | Ig-like domain-containing protein                             |
| ENSGALG00000050023                     | 11.38                            | Ig-like domain-containing protein                             |

|                    |       |                                          |
|--------------------|-------|------------------------------------------|
| ENSGALG00000052651 | 11.34 | Ig-like domain-containing protein        |
| ENSGALG00000052542 | 11.27 | Ig-like domain-containing protein        |
| ENSGALG00000054874 | 11.26 | Ig-like domain-containing protein        |
| ENSGALG00000049450 | 11.22 | Immunoglobulin lambda like polypeptide 1 |
| ENSGALG00000047960 | 11.03 | Ig-like domain-containing protein        |
| ENSGALG00000054437 | 10.97 | Ig-like domain-containing protein        |
| ENSGALG00000055104 | 10.95 | Ig-like domain-containing protein        |

| Chicken 12 wpi highly downregulated DEG |                     |                                                 |
|-----------------------------------------|---------------------|-------------------------------------------------|
| Gene                                    | Log <sub>2</sub> FC | Description (Ensembl) or Protein Name (UniProt) |
| ENSGALG00000053641                      | -3.36               | Uncharacterized protein                         |
| ENSGALG00000047107                      | -3.08               | Long non-coding RNA                             |
| ENSGALG00000045001                      | -2.85               | Long non-coding RNA                             |
| ENSGALG00000043906                      | -2.74               | chicken D-serine dehydratase                    |
| ENSGALG00000052075                      | -2.63               | Uncharacterized protein                         |
| ENSGALG00000029168                      | -2.37               | Collectrin domain-containing protein            |
| ENSGALG00000046845                      | -2.18               | Long non-coding RNA                             |
| ENSGALG00000051605                      | -2.09               | Long non-coding RNA                             |

<sup>1</sup> Log<sub>2</sub>FC = Log<sub>2</sub> Fold Change

<sup>2</sup> Ensembl release 106: Apr 2022

**Table S6.** Top 20 highly up- and downregulated novel long non-coding RNAs (lncRNAs) in ducks and chickens

| Duck 4 wpi highly upregulated lncRNAs   |                                  | Chicken 4 wpi highly upregulated lncRNAs   |                     |
|-----------------------------------------|----------------------------------|--------------------------------------------|---------------------|
| Gene                                    | Log <sub>2</sub> FC <sup>1</sup> | Gene                                       | Log <sub>2</sub> FC |
| ENSAPLG00000023351                      | 7.33                             | ENSGALG00000052161                         | 2.64                |
| ENSAPLG00000027245                      | 7.02                             | ENSGALG00000052516                         | 2.02                |
| ENSAPLG00000030029                      | 7.02                             |                                            |                     |
| ENSAPLG00000023929                      | 6.48                             | Chicken 4 wpi highly downregulated lncRNAs |                     |
| ENSAPLG00000028494                      | 6.10                             | Gene                                       | Log <sub>2</sub> FC |
| ENSAPLG00000012096                      | 6.00                             | ENSGALG00000049586                         | -3.47               |
| ENSAPLG00000024074                      | 5.96                             | ENSGALG00000029331                         | -3.39               |
| ENSAPLG00000018036                      | 5.92                             | ENSGALG00000052021                         | -3.34               |
| ENSAPLG00000021010                      | 5.57                             | ENSGALG00000048945                         | -3.13               |
| ENSAPLG00000016648                      | 5.54                             | ENSGALG00000054594                         | -2.91               |
| ENSAPLG00000023964                      | 5.32                             | ENSGALG00000051742                         | -2.62               |
| ENSAPLG00000017123                      | 5.30                             | ENSGALG00000043657                         | -2.58               |
| ENSAPLG00000023775                      | 5.28                             | ENSGALG00000043925                         | -2.29               |
| ENSAPLG00000017122                      | 5.26                             | ENSGALG00000048184                         | -2.28               |
| ENSAPLG00000022141                      | 5.19                             | ENSGALG00000050200                         | -2.17               |
| ENSAPLG00000028601                      | 5.06                             | ENSGALG00000053368                         | -2.12               |
| ENSAPLG00000026563                      | 5.03                             |                                            |                     |
| ENSAPLG00000018634                      | 4.92                             | Chicken 12 wpi highly upregulated lncRNAs  |                     |
| ENSAPLG00000020790                      | 4.90                             | Gene                                       | Log <sub>2</sub> FC |
| ENSAPLG00000026448                      | 4.82                             | ENSGALG00000052959                         | 7.95                |
|                                         |                                  | ENSGALG00000047851                         | 7.45                |
|                                         |                                  | ENSGALG00000051998                         | 7.40                |
| Duck 4 wpi highly downregulated lncRNAs |                                  | ENSGALG00000051039                         | 6.87                |
| Gene                                    | Log <sub>2</sub> FC              | ENSGALG00000049423                         | 6.82                |
| ENSAPLG00000019061                      | -4.56                            | ENSGALG00000053060                         | 6.66                |
| ENSAPLG00000029485                      | -3.89                            | ENSGALG00000004167                         | 6.54                |
| ENSAPLG00000028039                      | -2.79                            | ENSGALG00000019325                         | 6.18                |
| ENSAPLG00000018213                      | -2.39                            |                                            |                     |

|                                               |                          |                                                    |                          |
|-----------------------------------------------|--------------------------|----------------------------------------------------|--------------------------|
| ENSAPLG00000021011                            | -2.26                    | ENSGALG00000054932                                 | 6.16                     |
| ENSAPLG00000020436                            | -2.18                    | ENSGALG00000037363                                 | 6.15                     |
| ENSAPLG00000022296                            | -2.15                    | ENSGALG00000053738                                 | 6.12                     |
| ENSAPLG00000028968                            | -2.13                    | ENSGALG00000046879                                 | 6.11                     |
|                                               |                          | ENSGALG00000047054                                 | 6.10                     |
| <b>Duck 12 wpi highly upregulated lncRNAs</b> |                          | ENSGALG00000002102                                 | 6.10                     |
| <b>Gene</b>                                   | <b>Log<sub>2</sub>FC</b> | ENSGALG00000047087                                 | 5.62                     |
| ENSAPLG00000021010                            | 5.65                     | ENSGALG00000053080                                 | 5.41                     |
| ENSAPLG00000020790                            | 5.29                     | ENSGALG00000041611                                 | 5.33                     |
| ENSAPLG00000023929                            | 4.85                     | ENSGALG00000033094                                 | 5.24                     |
| ENSAPLG00000012096                            | 4.84                     | ENSGALG00000052451                                 | 4.96                     |
| ENSAPLG00000029118                            | 4.61                     | ENSGALG00000051565                                 | 4.92                     |
| ENSAPLG00000023351                            | 4.24                     |                                                    |                          |
| ENSAPLG00000025609                            | 3.58                     | <b>Chicken 12 wpi highly downregulated lncRNAs</b> |                          |
| ENSAPLG00000023152                            | 3.28                     | <b>Gene</b>                                        | <b>Log<sub>2</sub>FC</b> |
| ENSAPLG00000021565                            | 3.22                     | ENSGALG00000047107                                 | -3.08                    |
| ENSAPLG00000029930                            | 3.01                     | ENSGALG00000045001                                 | -2.85                    |
| ENSAPLG00000017062                            | 2.85                     | ENSGALG00000046845                                 | -2.18                    |
| ENSAPLG00000022020                            | 2.85                     | ENSGALG00000051605                                 | -2.09                    |
| ENSAPLG00000026217                            | 2.68                     |                                                    |                          |
| ENSAPLG00000022079                            | 2.52                     |                                                    |                          |
| ENSAPLG00000021959                            | 2.40                     |                                                    |                          |
| ENSAPLG00000020060                            | 2.24                     |                                                    |                          |
| ENSAPLG00000020403                            | 2.22                     |                                                    |                          |
| ENSAPLG00000021446                            | 2.21                     |                                                    |                          |
| ENSAPLG00000019869                            | 2.18                     |                                                    |                          |
| ENSAPLG00000021854                            | 2.17                     |                                                    |                          |

<sup>1</sup> Log<sub>2</sub>FC = Log<sub>2</sub> Fold Change

Not all groups had 20 highly differentially expressed lncRNAs. Ducks at 12 wpi had zero highly downregulated lncRNAs. Ensembl release 106: Apr 2022.
